# Supplementary material
Source: MDPI journal article supplement (https://www.mdpi.com/2304-6775/1/1/27)
Supplement: s1 [file s1]

## Supplementary A – The Survey

|                                                                                            |
|--------------------------------------------------------------------------------------------|
| <b>Open Access Journal Support Survey for<br/>University Librarians/University Presses</b> |
|--------------------------------------------------------------------------------------------|

This is a transcribed version of the English language online survey. The online survey was created using the SFU WebSurvey Tool ([websurveytool/sfu.ca](http://websurveytool/sfu.ca)).

1. **Does your organization provide journal hosting services and/or related support for online journals?**
  - a. Yes
  - b. No
  - c. Do Not Know
  
2. **Please select the geographic location of the main office(s) of your organization.**
  - Atlantic Canada
  - Quebuebec
  - Ontario
  - Prairies
  - British Columbia
  
3. **Does your organization provide journal hosting services and/or related support for online journals?**
  - a. Yes
  - b. No
  - c. Do Not Know

**If you answered NO to question 3, please proceed to Question 11.**

4. **What level of support for the following types of journal hosting services does your organization offer? Please select the appropriate response to each question.**

|                  |              |                 |            |
|------------------|--------------|-----------------|------------|
| A lot of support | Some support | Minimal support | No support |
|------------------|--------------|-----------------|------------|

  - a) Technical infrastructure (e.g servers) and related technical support.
  - b) Initial set-up of online journal and related technical support.
  - c) Continuous support for the online journal, including some management of the publishing workflow.
  - d) Provide full online journal publishing services, including management of the entire publishing

workflow.

e) please feel free to provide any further information about the journal hosting and associated services provided by your organization. [comment box will be included]

**5. How many journals does your organization host?**

- a. 1-5 journals b. 6-10 journals c. 11-20 journals
- d. More than 20 journals e. Do Not Know

**6. What percentage of online journals hosted by your organization are partially or wholly open access?**

- a. None
- b. Some c. Many d. All

**7. If you answered SOME, MANY or ALL to question 6 please go to question 8. If you answered NONE to question 6, please answer this question. Does your organization plan to host open access journals?**

- a. Yes, we have definite plans to host open access journals in the near future
- b. Yes, we are considering hosting open access journals in the near future c. No
- d. Do Not Know

**8. How many FTE are involved in maintaining the journal hosting services?**

- a. 0 to 0.5 FTE b. 0.6 to 1 FTE c. 1.1 to 1.5 FTE d. 1.6 to 2 FTE
- e. Greater than 2 FTE
- f. Do Not Know

**9. What department or unit at your organization is responsible for the maintenance of your journal hosting platform?**

- a. University Press or other scholarly press
- b. University Library
- c. University IT/Campus Computing Services dept.
- d. Maintenance is contracted out to an outside organization e. Other
- f. Do Not Know

10. If you answered "Other" to question 9, please name the entity that is responsible for maintenance of your journal hosting platform. Otherwise please proceed to Question 15.

**Please go to Question 15**

11. What do you see as the main reasons why your organization is not offering journal hosting services? Please select all that apply.
- a. Journal hosting is not part of the organization's mandate.
  - b. Insufficient budget resources.
  - c. Insufficient personnel resources.
  - d. The organization has no interest in providing journal hosting and related services.
  - e. Someone else, either outside of the organization but within the same institution, or else completely external to the organization, is already doing it.
  - f. Other [include comment box]

12. If you answered "Other" to question 11, please state the "other reason" why your organization is not offering journal hosting services. Otherwise please proceed to Question 13.

13. Are you getting enquiries from Faculty members about offering journal hosting services?
- a. Yes
  - b. No
  - c. Do Not Know

14. Is your organization considering hosting journals or offering journal hosting services to your community in the future?
- a. Yes
  - b. No
  - c. Do Not Know

15. Here are some models of INTERNAL financial support (e.g. funding from within your organization, such as the Library, University, University Press, etc.) for scholarly publishing. Please indicate your comfort level with the following by checking the appropriate box for each option:

| Would not | Might support | Would support | Currentl N/ support |
|-----------|---------------|---------------|---------------------|
|-----------|---------------|---------------|---------------------|

- a. Support Canadian academic journals through subscriptions
- b. Pay for Open Access article processing fees, with revenue used by the journal to lower subscription prices.

- c. Organizations purchase memberships or provide similar payments to Open Access publishers.
- d. Dedicate a portion of grant money overhead to pay open access publishing charges.
- e. Organizational budget monies (e.g a portion of Library Collections budget) used to support Open Access publishing.
- f. Host preprints or postprints of articles in the institutional repository.
- g. Transition consortia to consortial purchase of open access publishing services (e.g. SCOAP3 model).
- h. Endowment model: commit subscription monies to create endowment for ongoing open access (e.g. Stanford Encyclopedia of Philosophy model).

**16 . If you wish, please describe any other model of INTERNAL financial support for scholarly publishing that you are aware of and whether or not you would support it.**

**17. Here are some models of EXTERNAL financial support (e.g. funding from outside of your organization, such as funding agencies, provincial or federal governments, etc.) for scholarly publishing. Please indicate your comfort level with the following by checking the appropriate box for each option:**

|                      |                  |                  |                      |     |
|----------------------|------------------|------------------|----------------------|-----|
| Would<br>not support | Might<br>support | Would<br>support | Currently<br>support | N/A |
|----------------------|------------------|------------------|----------------------|-----|

- a. Dedicate a portion of grant money overhead to pay open access publishing charges.
- b. Funding agencies extend financial support to Open Access journals.
- c. Provincial government funding directed to support Open Access publishing in your organization's province.

- 18 . **If you wish, please describe any other model of INTERNAL financial support for scholarly publishing that you are aware of and whether or not you would support it.**
19. **Is your organization prepared to reallocate production and/or acquisitions budget for traditional journal publications to new models of scholarly publishing such as Open Access?**
- a. Yes
  - b. No
  - c. My organization is already doing this
  - d. If you wish to elaborate on your answer, please do so below:  
[add here a box here for comments]
- 20 . **If you wish to elaborate on your answer in question 19, please do so below. Otherwise please proceed to Question 21.**
21. **Is your organization a member of one or more of the following types of Open Access initiatives? Please check all that apply.**
- a. Open Access publisher organizations (e.g. Open Access Scholarly Publishers Association).
  - b. Open Access content providers (e.g. PLoS, BioMed Central).
  - c. Advocacy organizations (e.g. SPARC).
  - d. Open Access resources and services (e.g. Directory of Open Access Journals).
  - e. Not currently a member of any of the above groups
  - f. Don't know
  - g. Other
22. **If you answered "Other" in Question 21, please name the type of Open Access initiative. Otherwise please proceed to Question 23.** (textbox will be included)
22. Do you have any other comments you would like to share with us? (textbox will be included)

Thank you!

## Supplementary B – Consent Form

This study (application number 2010s0095) is being done under the auspices of Simon Fraser University. In order to comply with Simon Fraser University requirements for research involving human subjects, we require free and informed consent for all survey participants. Please review the consent form below.

----- CONSENT-----

Consent Form for Online Survey: National Survey on support for open access journals at Canadian universities and Canadian university presses.

Principal Investigators:

Donald Taylor, MLIS

Assistant Head, Access Services, Simon Fraser University Library

Tel. 778-782-5596 Email: [dstaylor@sfu.ca](mailto:dstaylor@sfu.ca)

Kumiko Vézina, MLIS

Associate Librarian, Concordia University Library

Tel. 778-782-5596 Email: [dstaylor@sfu.ca](mailto:dstaylor@sfu.ca)

Co-Investigators:

Heather Morrison, MLIS

Project Coordinator, BC Electronic Library Network & Simon Fraser University Library

Brian Owen, MLS

Associate University Librarian, Simon Fraser University Library

Andrew Waller, MLS

Serials Librarian, University of Calgary Library

**Purpose:** The purpose of this study is to explore the extent to which universities and university presses are supporting Open Access journals through online journal hosting services and changes in library collections policies. It is hoped that survey results will identify mechanisms of support for Open Access publishing in Canada.

We are therefore conducting an online survey of librarians at university libraries that are members of the Canadian Research Knowledge Network (CRKN), administrators of university presses, and administrators of scholarly presses located at Canadian universities, in order to gather information on Canadian university libraries' and Canadian scholarly presses' level of involvement in hosting online journals and to gather information on their attitudes about future directions in support for open access journals.

**Confidentiality:** The survey software being used anonymizes all responses and does not allow surveys to be identified with the respondent. Survey responses will be kept confidential with respect to the law, and only selected quotations from the survey responses will be published. No quotations or responses will be attributed to named individuals. Quotations will only be attributed by type of respondent and institution: e.g., university press administrator or librarian, large or small university, etc.

Access to survey results stored on computer will be restricted through the use of electronic passwords. Only Donald Taylor, Kumiko Vezina, and the study co-investigators will have access to the data.

As part of the open data initiative, the survey data, in completely anonymized format, will be made openly accessible.

**Privacy:** This online survey was built with the Simon Fraser University survey software tool, and is hosted by Simon Fraser University on servers located in a secure server environment in Burnaby, BC, in compliance with section 30.1 of the BC Freedom of Information and Protection of Privacy Act (FIPPA). All data will be destroyed by the investigators three years after completion of the data analysis. This data will be stored on CD and will be kept in a locked drawer in a secure environment.

**Remuneration/Compensation:** There are no direct benefits to you as a participant of this study. However, your participation will provide valuable information on institutional strategies to support open access, which may prove useful to university libraries and presses across the country.

**Further Follow-up or Contact:** Upon completion of the survey, there will be no further follow-up or contact made with survey participants regarding the survey.

**Conflicts of Interest:** There are no known conflicts of interest.

**Contact for Information About the Study and to Obtain Research Results:** If you have any questions or desire further information with respect to this study, you may contact Donald Taylor by telephone 778-782-5596 or email [dstaylor@sfu.ca](mailto:dstaylor@sfu.ca).

**Complaints:**

Complaints to be directed to

Hal Weinberg, Director

Office of Research Ethics

Simon Fraser University

Burnaby, B.C. Canada

V5A 1S6

778 782 6593

Application number. e.g., [2010s0095]

---

**\* Consent:**

Your participation in this study is entirely voluntary and you may refuse to participate or withdraw from the study at any time without jeopardy to your employment or relationship with us.

By selecting "I have read the consent form and AGREE to participate in this survey," you imply that you have fully read and understood this consent form, that you consent to voluntarily participate in this study, and that you give permission to be surveyed. Completion of the survey constitutes consent to participate in the study and you imply that you understand how the information will be used, as per the terms above.

Please choose *\*only one\** of the following:

I DO NOT agree to participate in this survey

I have read the consent form and AGREE to participate in this survey
